# Supplementary material for: Mental health problems in the 10th grade and non-completion of upper secondary school: the mediating role of grades in a population-based longitudinal study
Source: PubMed Central journal article supplement (PMC3905670; doi:10.1186/1471-2458-14-16), 2014-01-09
Supplement: 1471-2458-14-16-S1.pdf [file 1471-2458-14-16-S1.pdf]

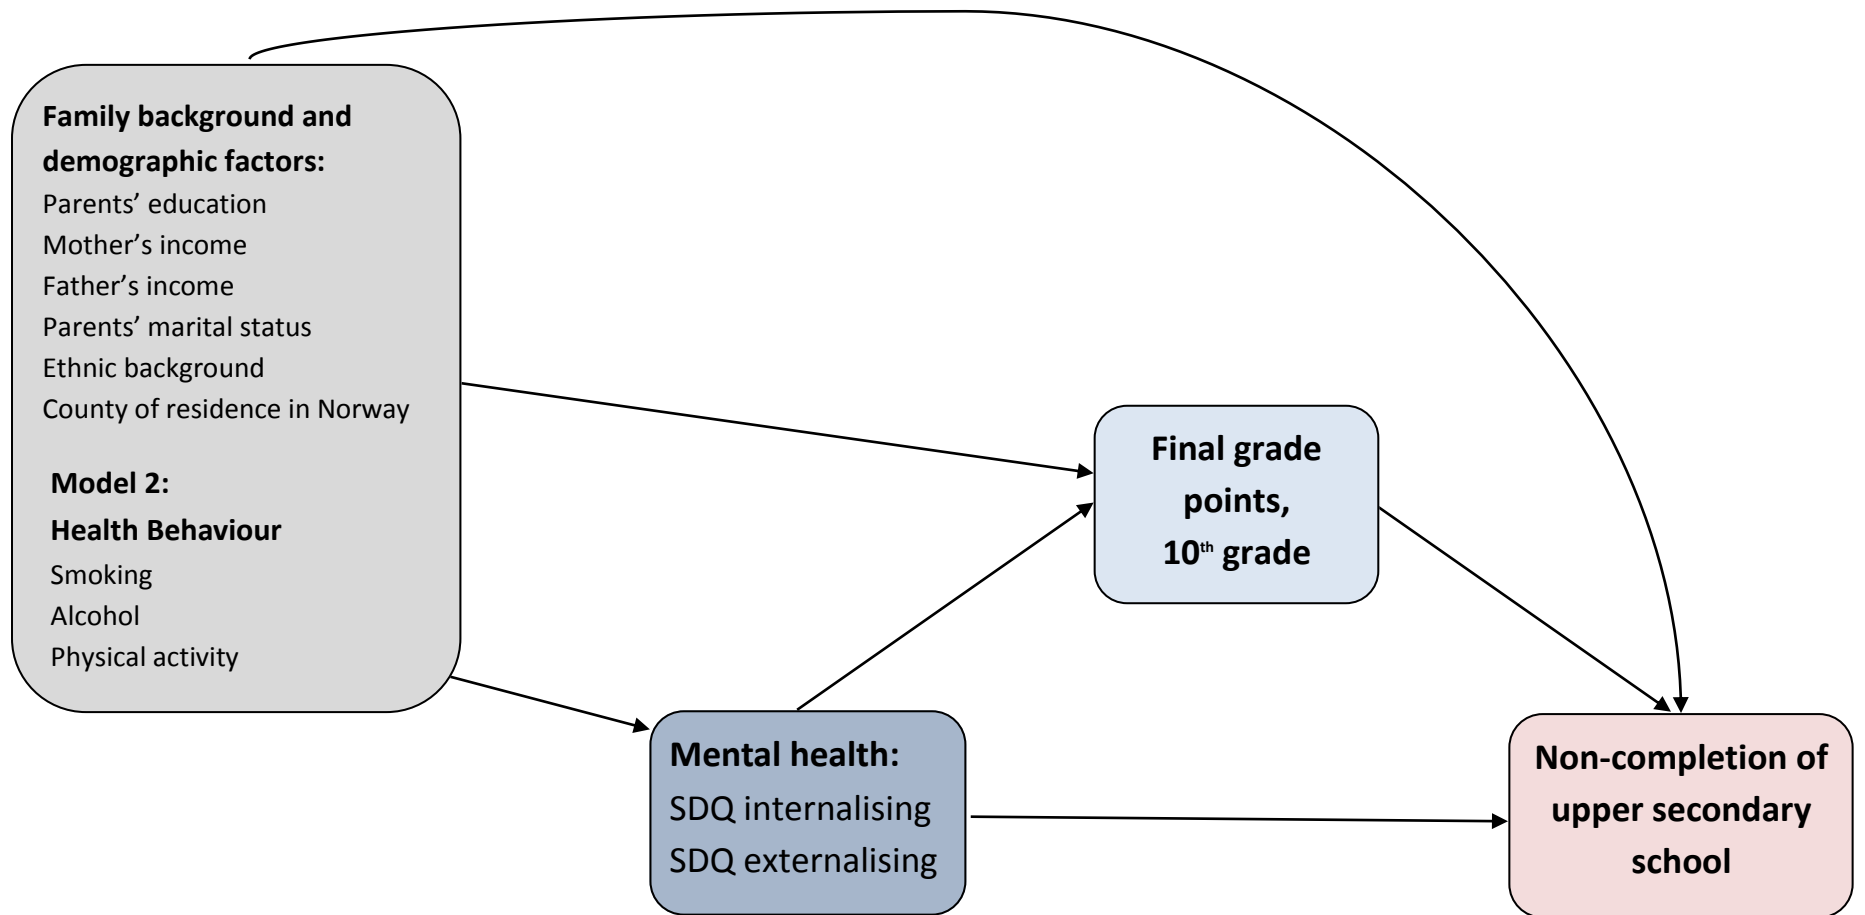

**Additional file 1: Figure S1-** The model assumed in the causal mediation analyses.
