# Supplementary material for: Mental health problems in the 10th grade and non-completion of upper secondary school: the mediating role of grades in a population-based longitudinal study
Source: PubMed Central journal article supplement (PMC3905670; doi:10.1186/1471-2458-14-16), 2014-01-09
Supplement: 1471-2458-14-16-S2.pdf [file 1471-2458-14-16-S2.pdf]

**OR, by 10 percentage points less**

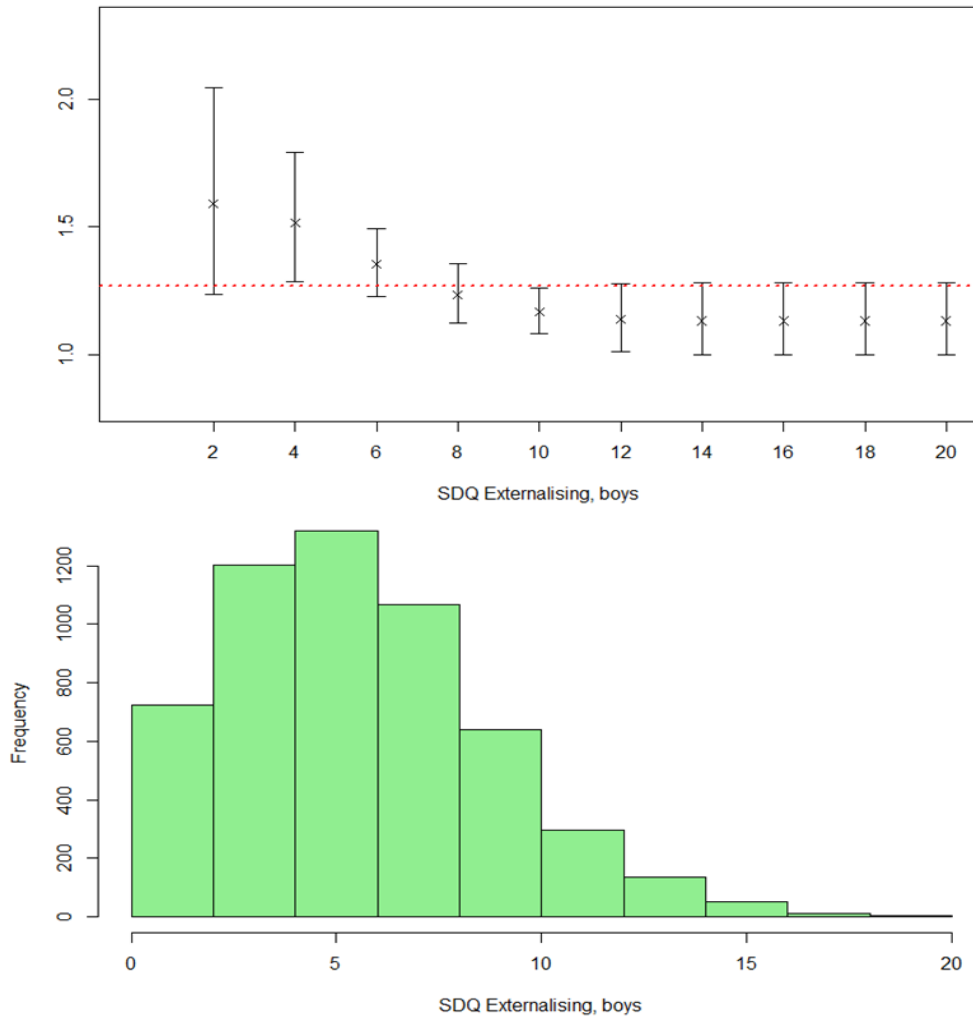

**Additional file 2: Figure S2-** (A) Odds ratio (OR) by 2 points less for externalising problems, with 95% confidence interval in boys.

There is a statistical significant inhomogeneity of OR ( $P = 0.009$ ). The dotted line is an average OR of 1.27, assuming linearity.

(B) Histogram for the distribution of the externalising problem scores in boys.
