# Supplementary material for: Mental health problems in the 10th grade and non-completion of upper secondary school: the mediating role of grades in a population-based longitudinal study
Source: PubMed Central journal article supplement (PMC3905670; doi:10.1186/1471-2458-14-16), 2014-01-09
Supplement: 1471-2458-14-16-S3.pdf [file 1471-2458-14-16-S3.pdf]

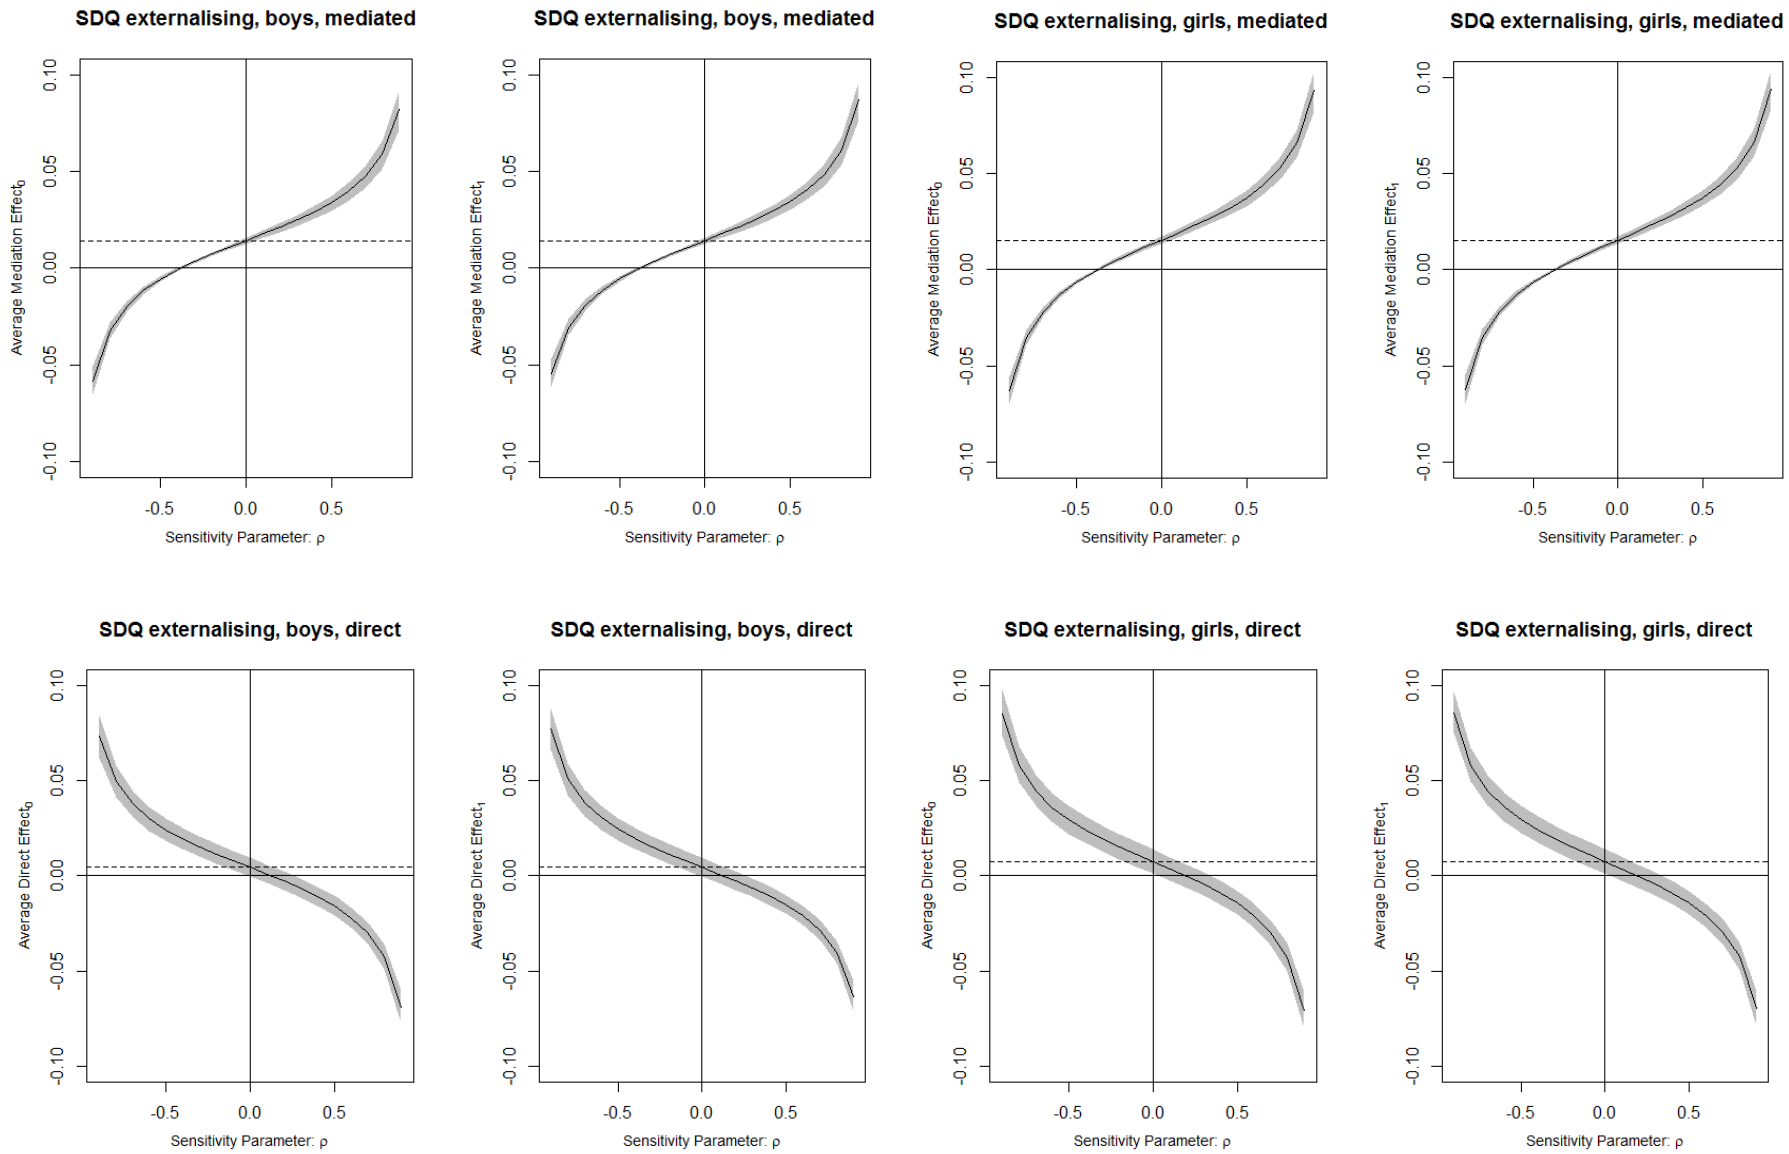

**Additional file 3: Figure S3a** - Graphical display of Results from the sensitivity analyses for direct and indirect effect of externalising problems by gender ('Medsens' function). Results as a function of  $\rho$ .

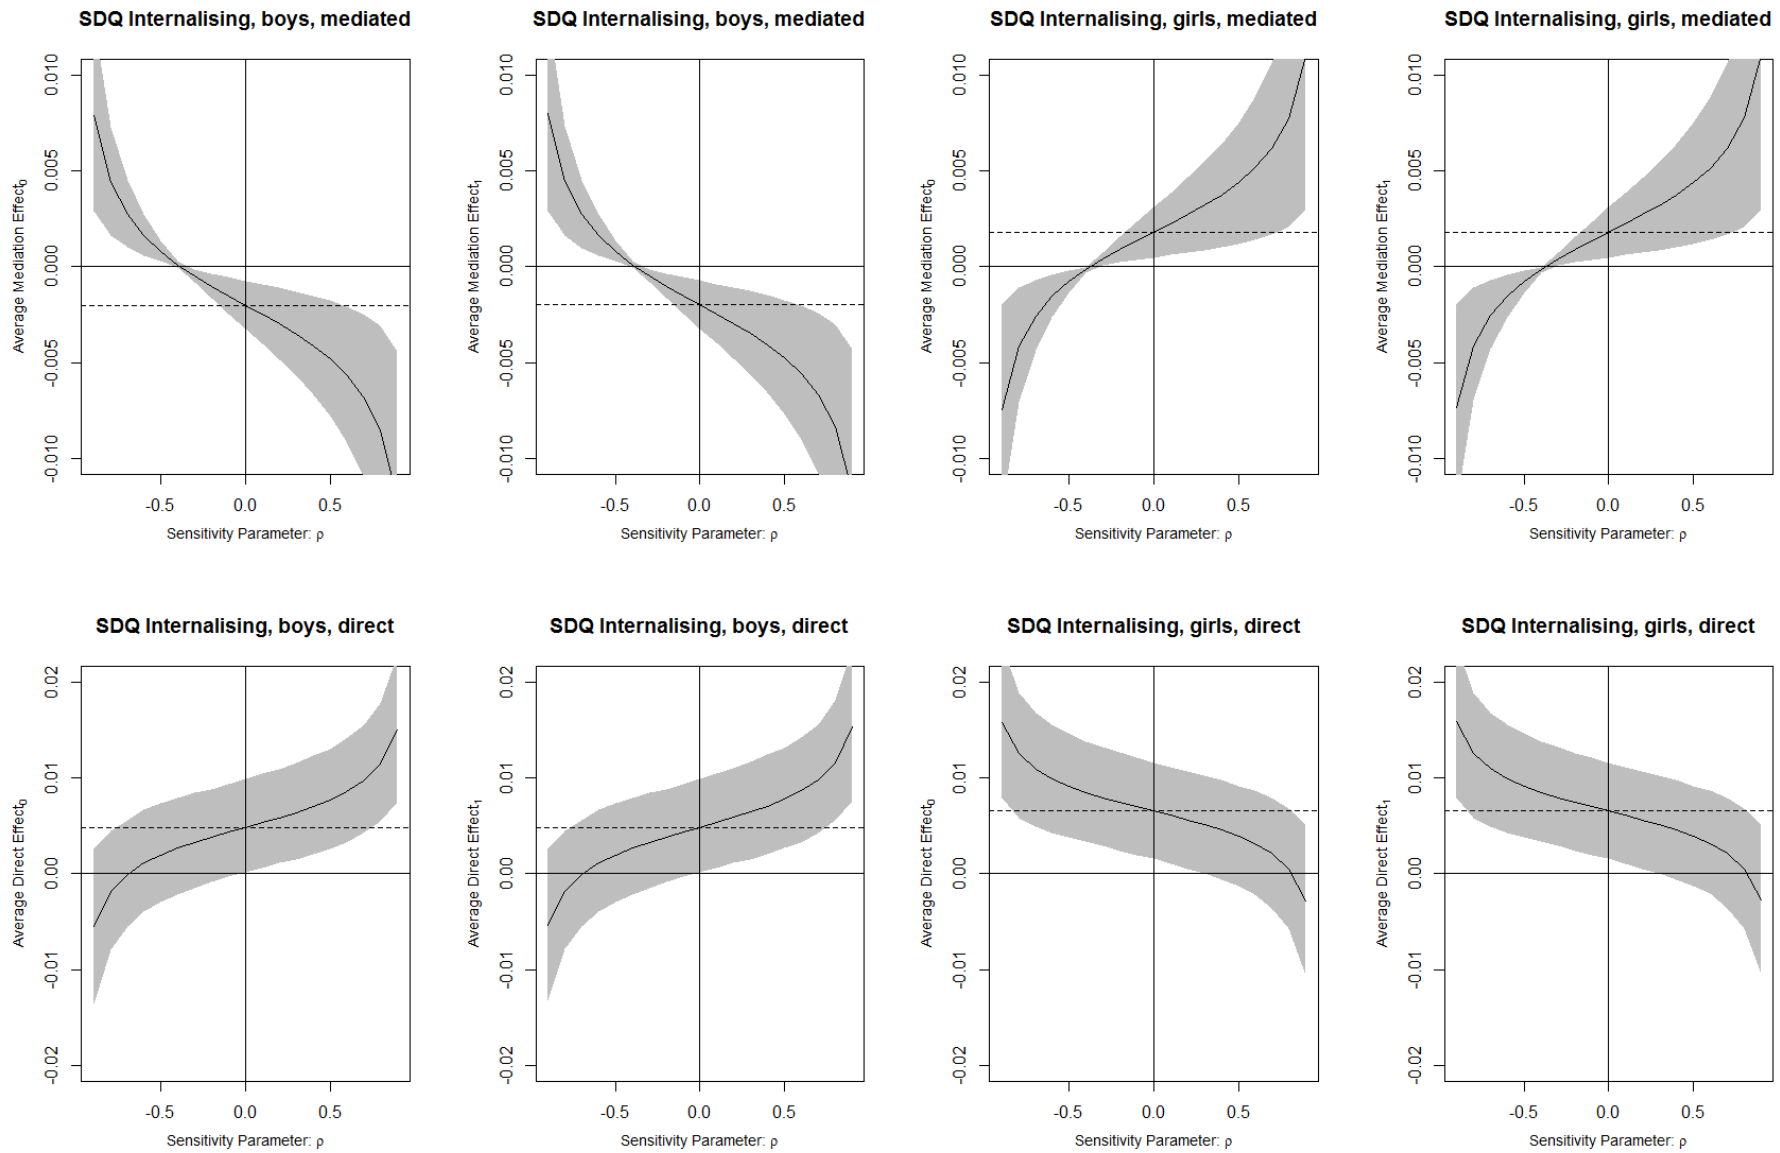

**Additional file 3b** - Graphical display of results from the sensitivity analyses for direct and indirect effect of internalising problems by gender ('Medsens' function). Results as a function of  $\rho$ .
